# Supplementary material for: Concentration Independent Modulation of Local Micromechanics in a Fibrin Gel
Source: PLOS journal article supplement (doi:10.1371/journal.pone.0020201), 2011-05-23
Supplement: S1 (10.1371/journal.pone.0020201.s001) [file journal.pone.0020201.s001]

GENERAL NOTES:

| REVISION | MODELED BY   | DRAWN BY     | CHECKED BY   | DATE      |
|----------|--------------|--------------|--------------|-----------|
| A        | SAMIR SHREIM | SAMIR SHREIM | SAMIR SHREIM | 5/21/2009 |
| B        | SAMIR SHREIM | SAMIR SHREIM |              |           |

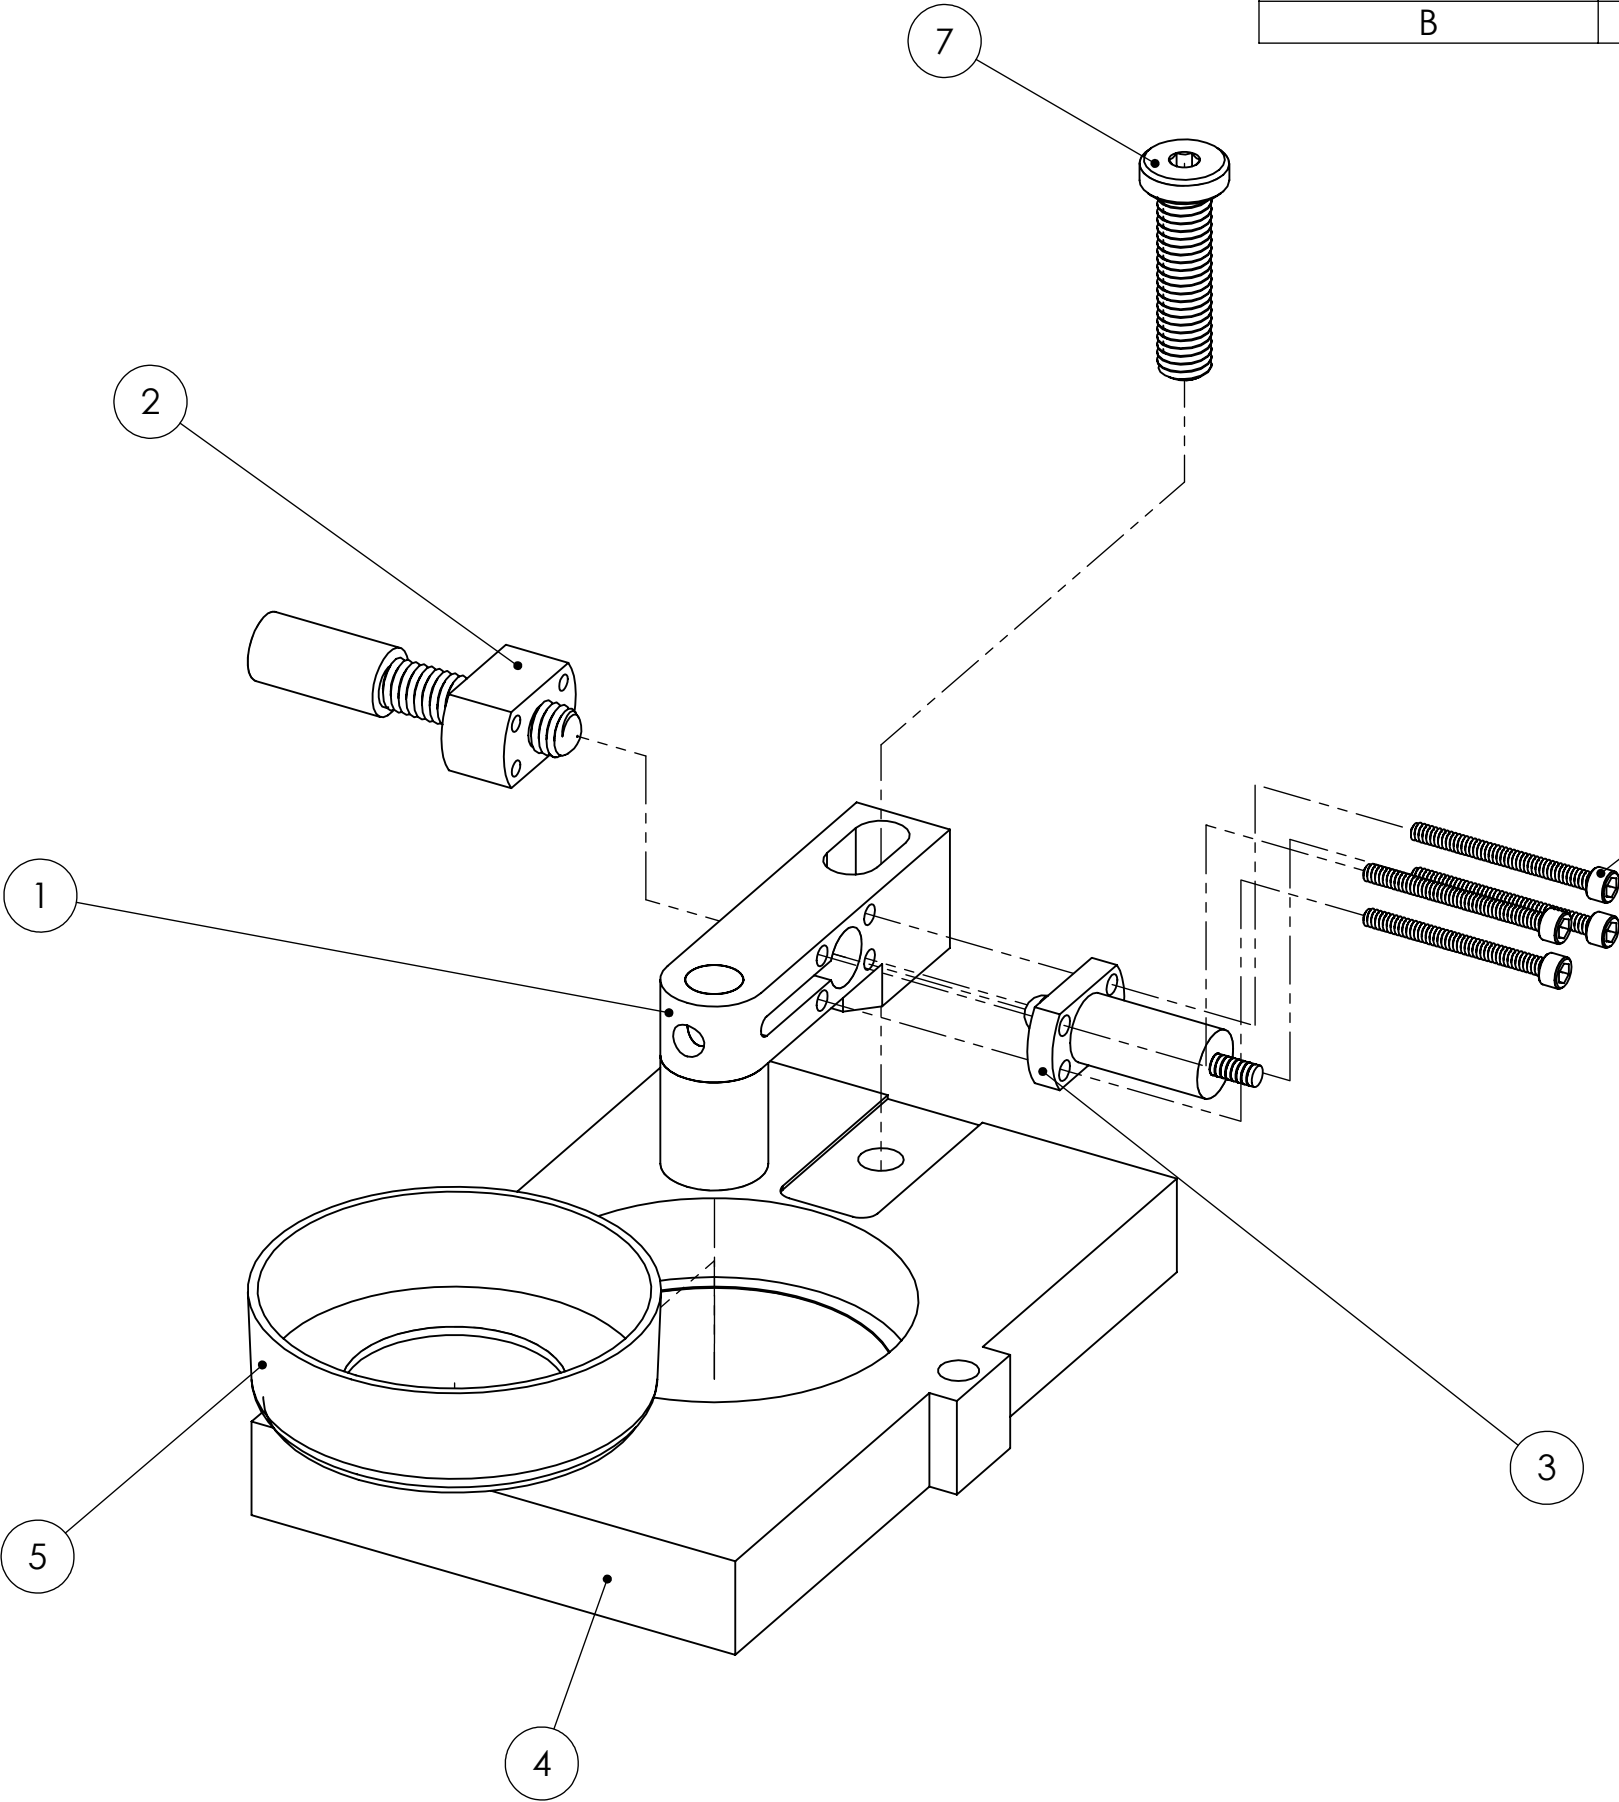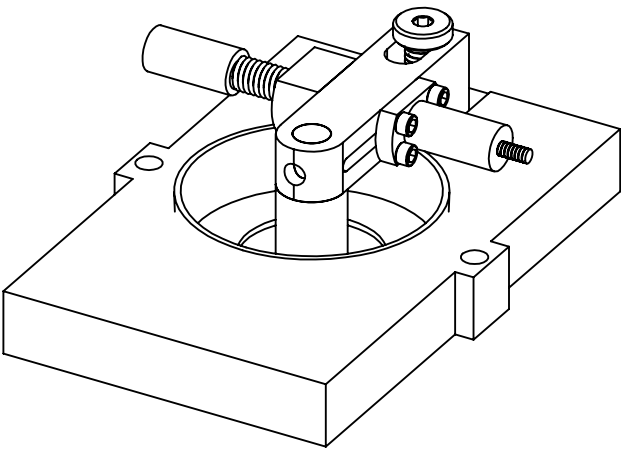

| ITEM NO. | PART NUMBER | DESCRIPTION                                                 | QTY. |
|----------|-------------|-------------------------------------------------------------|------|
| 1        | 107-001-000 | CROSS ARM ASSEMBLY                                          | 1    |
| 2        | 107-002-000 | LEADSCREW ASSEMBLY                                          | 1    |
| 3        | 107-003-000 | SPRING PLUNGER ASSEMBLY                                     | 1    |
| 4        | 107-000-001 | BASEPLATE                                                   | 1    |
| 5        | -           | MATTEK P35G-1.5-20-C<br>GLASS BOTTOM CULTURE<br>DISH        | 1    |
| 6        | -           | 1-64 X 0.725 SHCS,<br>BRIGHTON BEST 592060                  | 4    |
| 7        | -           | 10-32 X 3/4 LOW PROFILE<br>SHCS, MCMASTER CARR<br>93615A385 | 1    |

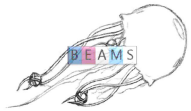

UNLESS OTHERWISE SPECIFIED  
DIMENSIONS ARE IN INCHES  
TOLERANCES:  
FRACTIONAL  $\pm 1/32$   
ANGULAR: MACH  $\pm 0.5$  DEG  
TWO PLACE DECIMAL  $\pm 0.01$   
THREE PLACE DECIMAL  $\pm 0.005$

TITLE:  
**SHEAR GRADIENT  
DEVICE**

|                                                                                                                                                                                                                        |  |          |                    |              |
|------------------------------------------------------------------------------------------------------------------------------------------------------------------------------------------------------------------------|--|----------|--------------------|--------------|
| PROPRIETARY AND CONFIDENTIAL                                                                                                                                                                                           |  | SIZE     | DWG. NO.           | REV          |
| THE INFORMATION CONTAINED IN THIS DRAWING IS THE SOLE PROPERTY OF THE BEAMS LAB at UC'S BECKMAN LASER INSTITUTE. ANY REPRODUCTION IN PART OR AS A WHOLE WITHOUT THE WRITTEN PERMISSION OF THE BEAMS LAB IS PROHIBITED. |  | <b>B</b> | <b>107-000-000</b> | <b>B</b>     |
| SCALE: 1.5:1                                                                                                                                                                                                           |  | WEIGHT:  |                    | SHEET 1 OF 1 |

2. FRICTION FIT WITH MATTEK P35G-1.5-20-C (35 mm GLASS BOTTOM CULTURE DISH)  
DISH SHALL NOT ROTATE UNDER FULL RANGE OF ROTATOR SHAFT ACTUATION

An isometric drawing of a mechanical component. It is a rectangular block with a large circular hole in the center. On each of the four side faces, there is a small rectangular tab protruding outwards. Each tab has a small circular hole in its center, likely for a screw or pin. The drawing is shown from an isometric perspective, giving it a 3D appearance.

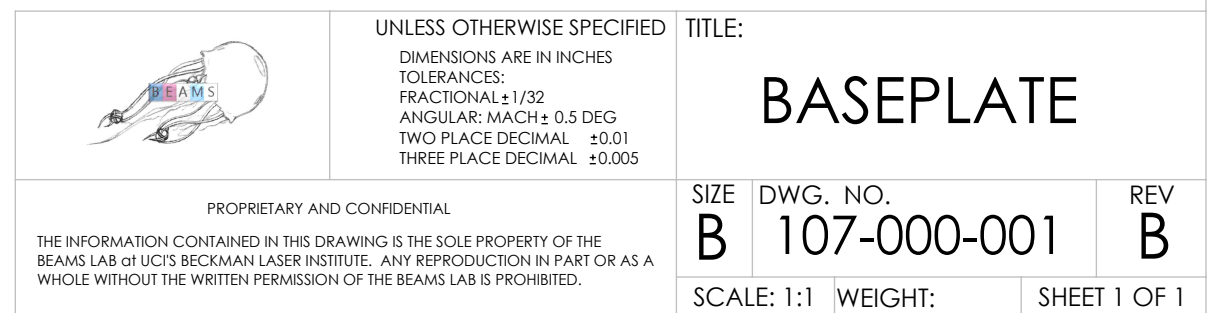

GENERAL NOTES:

1. BUSHING FIT AT 37°C 100% HUMIDITY

2. BUSHING FIT AT 37°C 100% HUMIDITY

| REVISION | MODELED BY   | DRAWN BY     | CHECKED BY   | DATE      |
|----------|--------------|--------------|--------------|-----------|
| A        | SAMIR SHREIM | SAMIR SHREIM | SAMIR SHREIM | 5/21/2009 |
| B        | SAMIR SHREIM | SAMIR SHREIM |              |           |

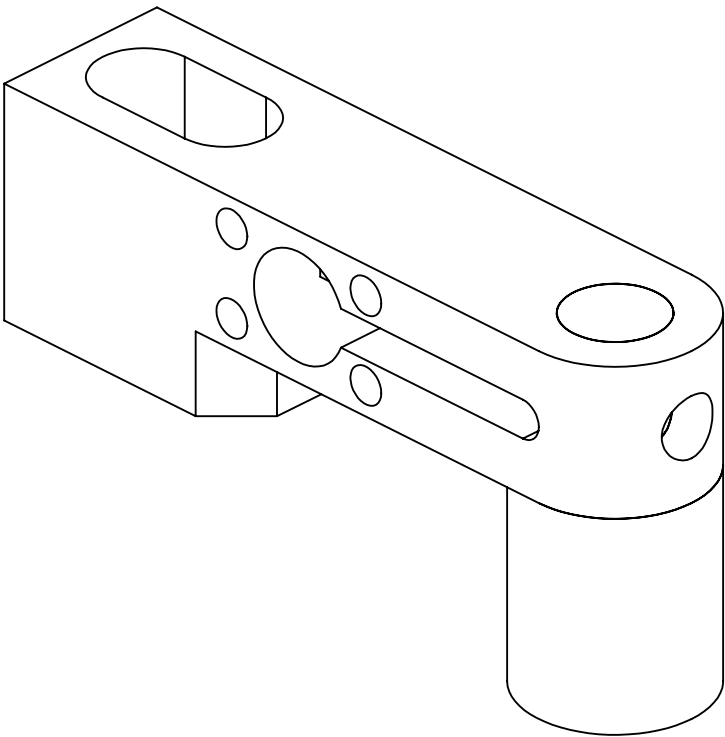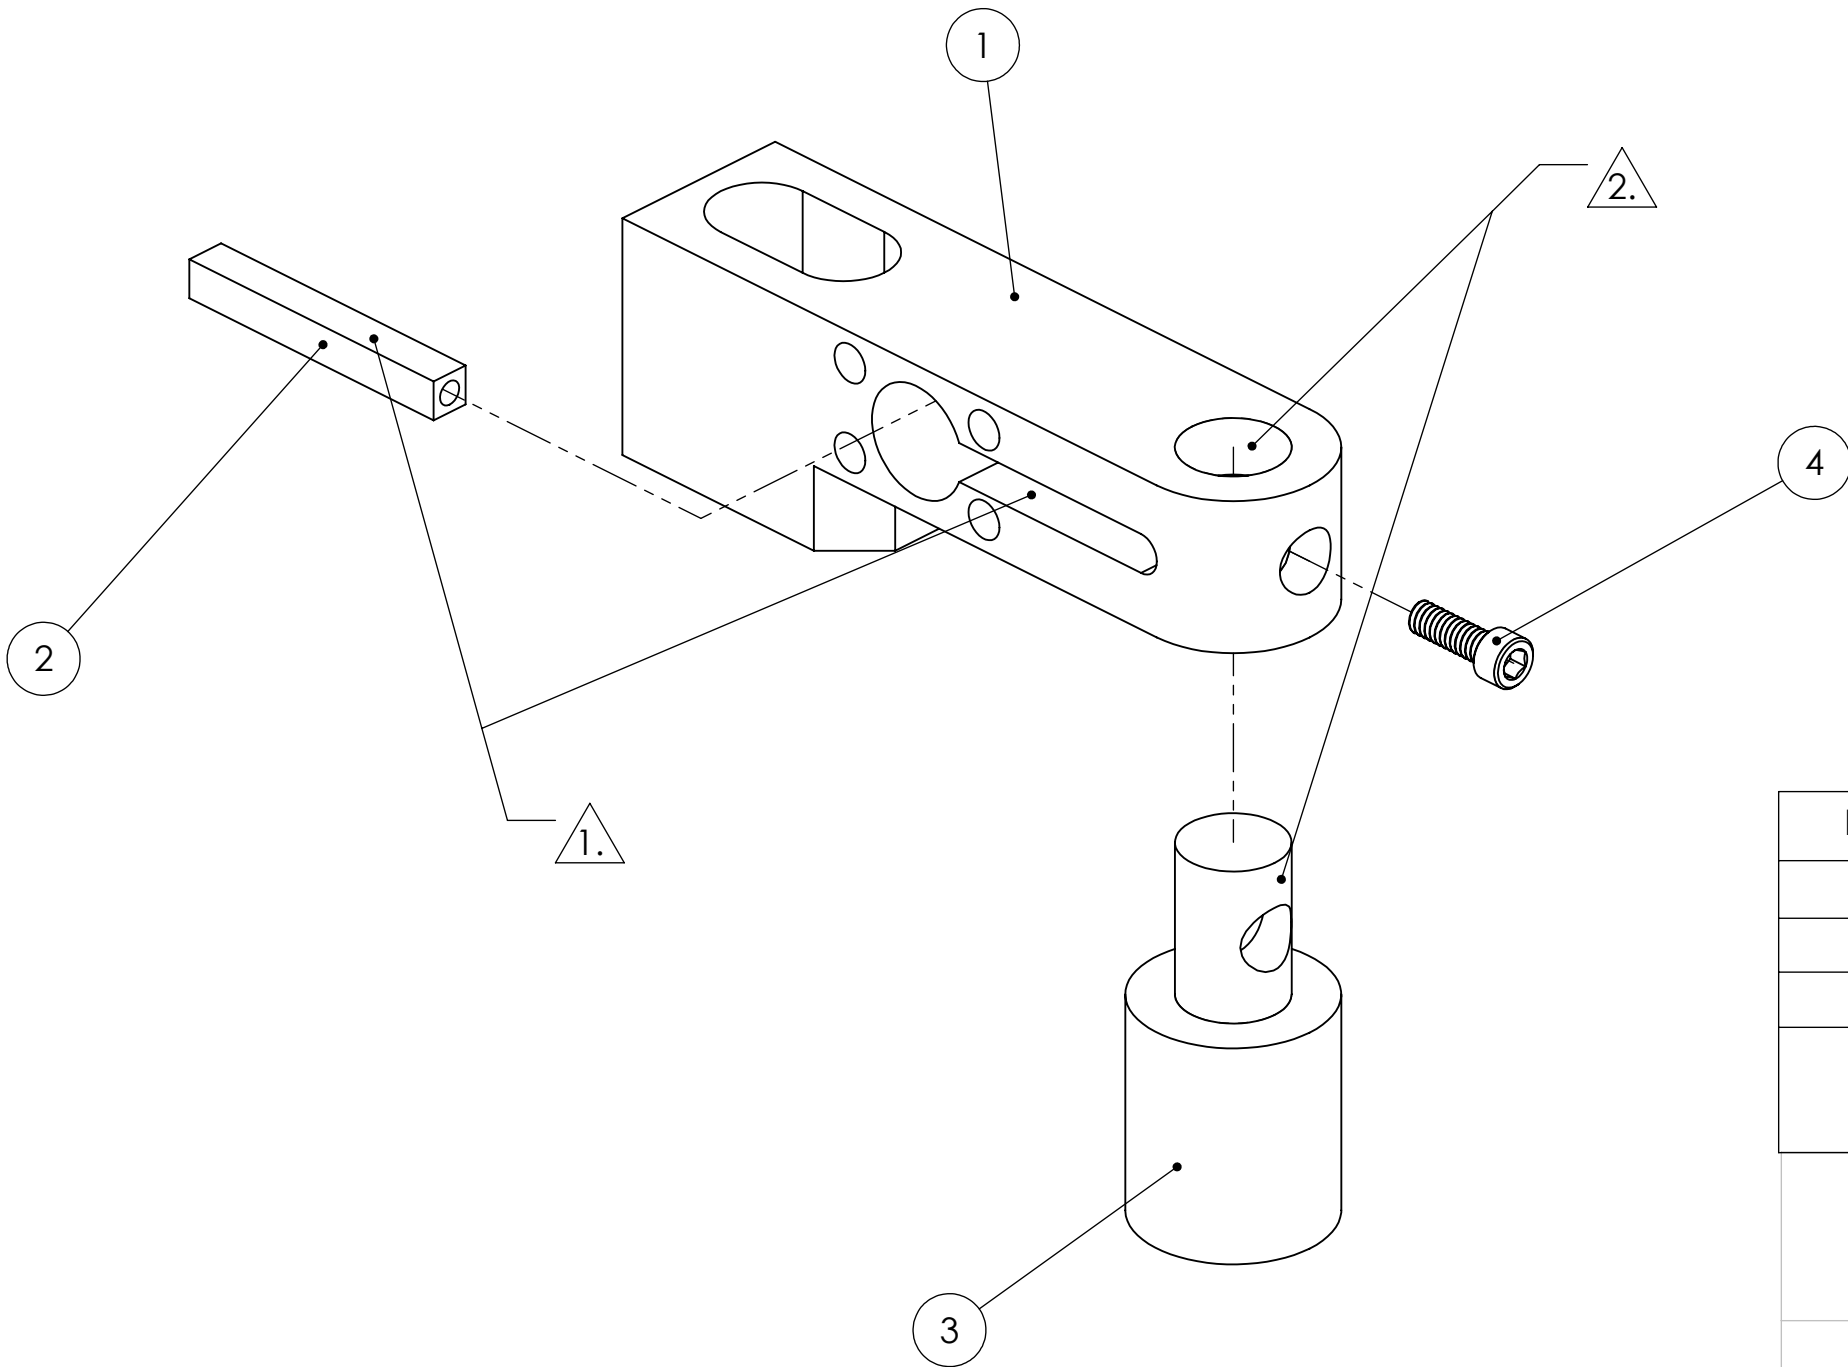

| ITEM NO. | PART NUMBER | DESCRIPTION                                                    | Exploded View/QTY. |
|----------|-------------|----------------------------------------------------------------|--------------------|
| 1        | 107-001-001 | CROSS ARM                                                      | 1                  |
| 2        | 107-001-002 | LEVER ARM                                                      | 1                  |
| 3        | 107-001-003 | ROTATOR SHAFT                                                  | 1                  |
| 4        | -           | 0-80 X 3/16 SHCS<br>STAINLESS, MCMASTER<br>CARR P/N: 92196A054 | 1                  |

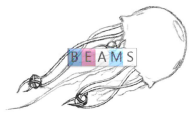

UNLESS OTHERWISE SPECIFIED  
DIMENSIONS ARE IN INCHES  
TOLERANCES:  
FRACTIONAL  $\pm 1/32$   
ANGULAR: MACH  $\pm 0.5$  DEG  
TWO PLACE DECIMAL  $\pm 0.01$   
THREE PLACE DECIMAL  $\pm 0.005$

TITLE:  
**CROSS ARM  
ASSEMBLY**

PROPRIETARY AND CONFIDENTIAL  
THE INFORMATION CONTAINED IN THIS DRAWING IS THE SOLE PROPERTY OF THE  
BEAMS LAB at UCI'S BECKMAN LASER INSTITUTE. ANY REPRODUCTION IN PART OR AS A  
WHOLE WITHOUT THE WRITTEN PERMISSION OF THE BEAMS LAB IS PROHIBITED.

| SIZE       | DWG. NO.    | REV          |
|------------|-------------|--------------|
| B          | 107-001-000 | B            |
| SCALE: 3:1 | WEIGHT:     | SHEET 1 OF 1 |

GENERAL NOTES:

1. MATERIAL: TEFLON (PTFE)

2. BUSHING FIT WITH ROTATOR SHAFT AT 37°C 100% HUMIDITY

| REVISION | MODELED BY   | DRAWN BY     | CHECKED BY   | DATE      |
|----------|--------------|--------------|--------------|-----------|
| A        | SAMIR SHREIM | SAMIR SHREIM | SAMIR SHREIM | 5/21/2009 |
| B        | SAMIR SHREIM | SAMIR SHREIM |              |           |

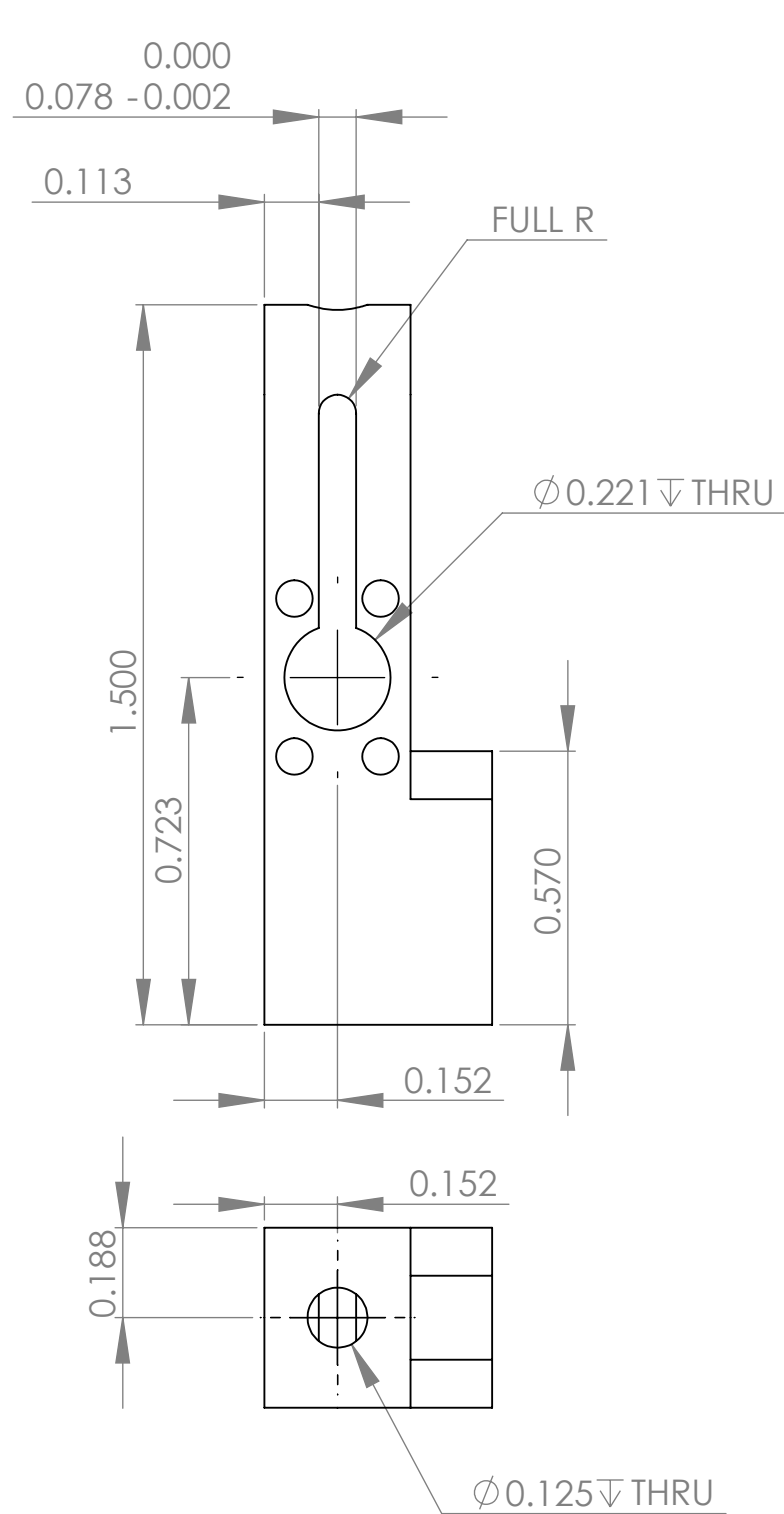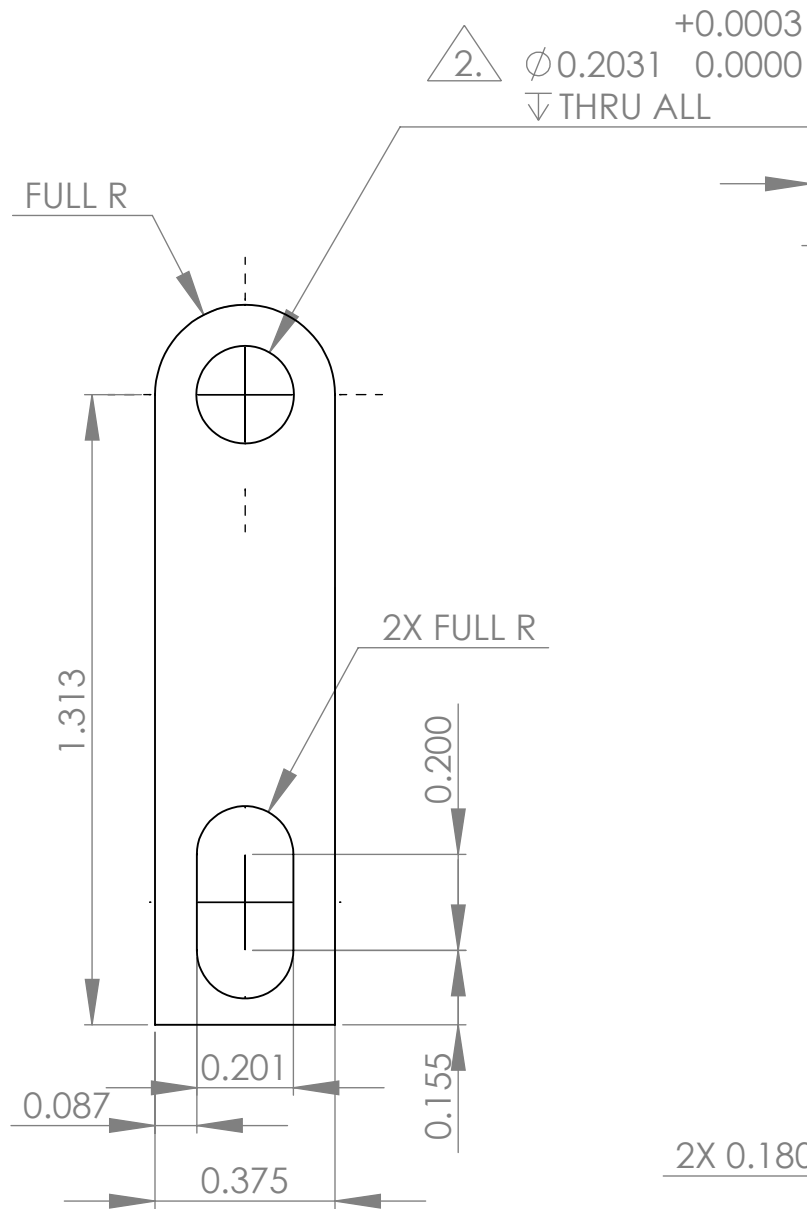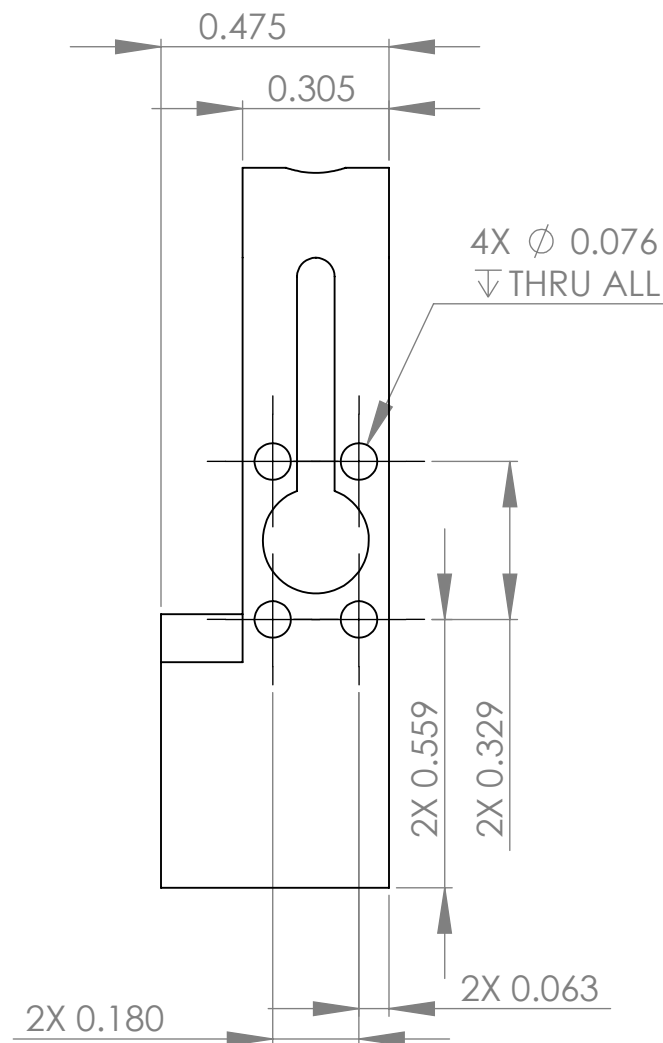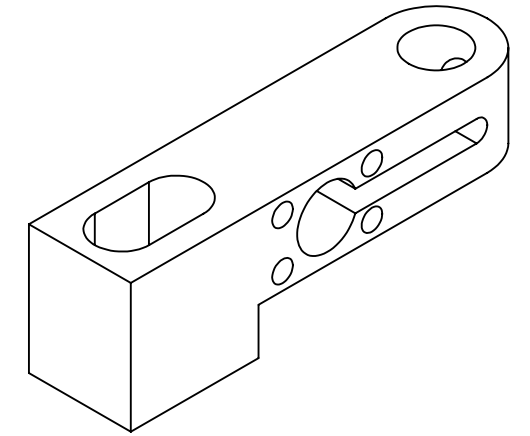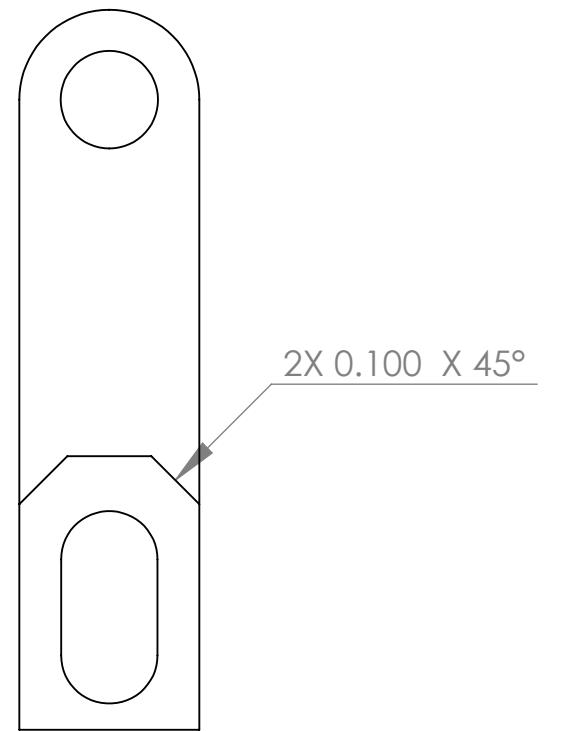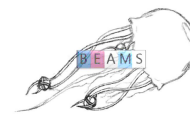

UNLESS OTHERWISE SPECIFIED  
DIMENSIONS ARE IN INCHES  
TOLERANCES:  
FRACTIONAL  $\pm 1/32$   
ANGULAR: MACH  $\pm 0.5$  DEG  
TWO PLACE DECIMAL  $\pm 0.01$   
THREE PLACE DECIMAL  $\pm 0.005$

TITLE:  
**CROSS ARM**

PROPRIETARY AND CONFIDENTIAL  
THE INFORMATION CONTAINED IN THIS DRAWING IS THE SOLE PROPERTY OF THE BEAMS LAB at UCI'S BECKMAN LASER INSTITUTE. ANY REPRODUCTION IN PART OR AS A WHOLE WITHOUT THE WRITTEN PERMISSION OF THE BEAMS LAB IS PROHIBITED.

|                  |                                |                         |
|------------------|--------------------------------|-------------------------|
| SIZE<br><b>B</b> | DWG. NO.<br><b>107-001-001</b> | REV<br><b>B</b>         |
| SCALE: 2.5:1     |                                | WEIGHT:<br>SHEET 1 OF 1 |

GENERAL NOTES:

1. MATERIAL: 303 STAINLESS STEEL

| REV | MODEL BY     | DRAWN BY     | CHECKED BY   | DATE      |
|-----|--------------|--------------|--------------|-----------|
| A   | SAMIR SHREIM | SAMIR SHREIM | SAMIR SHREIM | 5/21/2009 |
| B   | SAMIR SHREIM | SAMIR SHREIM |              |           |

2. BUSHING FIT WITH CROSS ARM AT 37°C 100% HUMIDITY

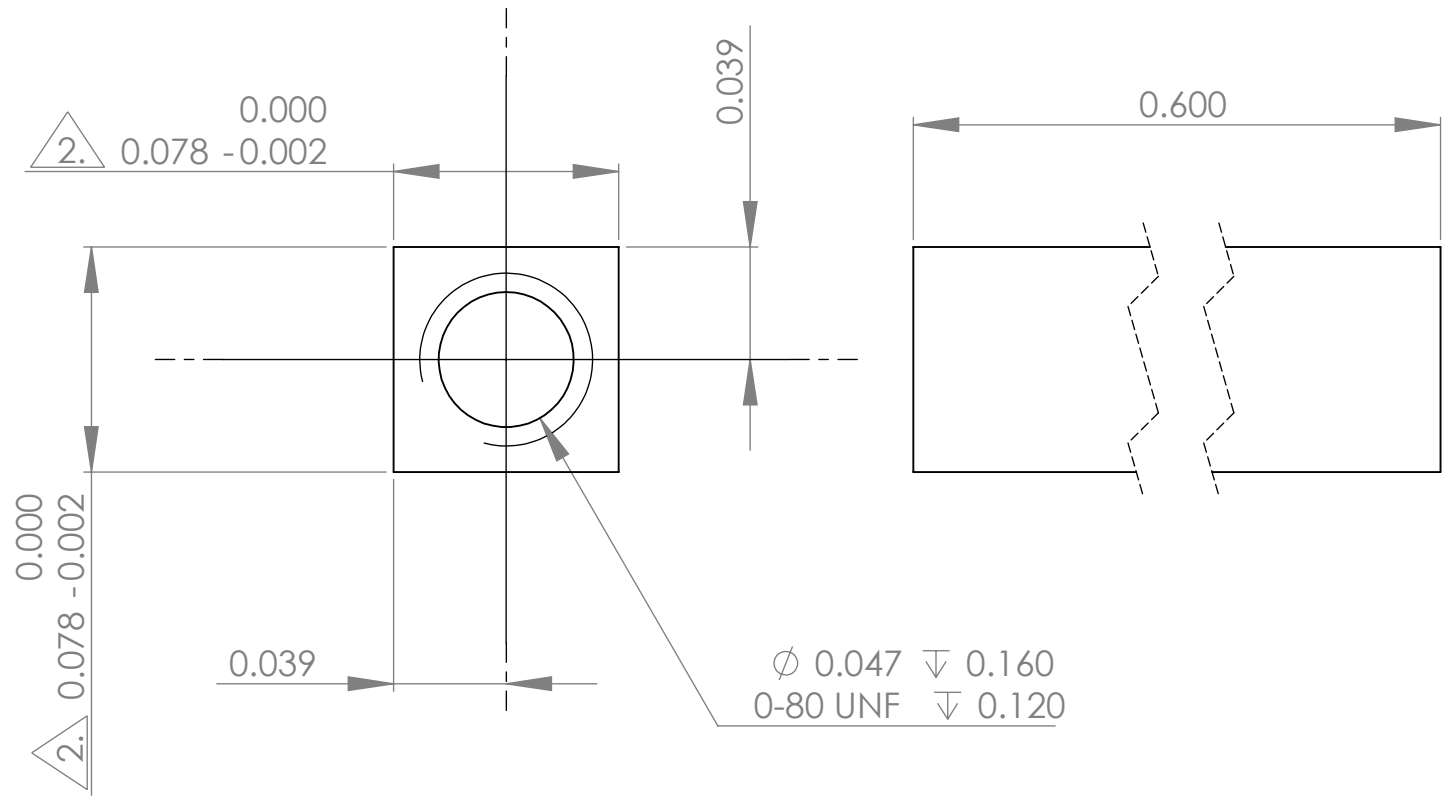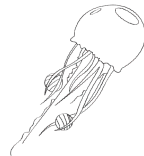

UNLESS OTHERWISE SPECIFIED  
DIMENSIONS ARE IN INCHES  
TOLERANCES:  
FRACTIONAL  $\pm 1/32$   
ANGULAR: MACH  $\pm 0.5$  DEG  
TWO PLACE DECIMAL  $\pm 0.01$   
THREE PLACE DECIMAL  $\pm 0.005$

TITLE:

LEVER ARM

PROPRIETARY AND CONFIDENTIAL  
THE INFORMATION CONTAINED IN THIS DRAWING IS THE SOLE PROPERTY OF THE BEAMS LAB AT UCI'S BECKMAN LASER INSTITUTE. ANY REPRODUCTION IN PART OR AS A WHOLE WITHOUT THE WRITTEN PERMISSION OF THE BEAMS LAB IS PROHIBITED.

|      |             |     |
|------|-------------|-----|
| SIZE | DWG. NO.    | REV |
| A    | 107-001-002 | B   |

|             |         |              |
|-------------|---------|--------------|
| SCALE: 15:1 | WEIGHT: | SHEET 1 OF 1 |
|-------------|---------|--------------|

GENERAL NOTES:

1. MATERIAL: IMPLANT GRADE UHMWPE

| REV | MODEL BY     | DRAWN BY     | CHECKED BY   | DATE      |
|-----|--------------|--------------|--------------|-----------|
| A   | SAMIR SHREIM | SAMIR SHREIM | SAMIR SHREIM | 5/21/2009 |
| B   | SAMIR SHREIM | SAMIR SHREIM |              |           |

2. BUSHING FIT WITH CROSS ARM AT 37°C 100% HUMIDITY

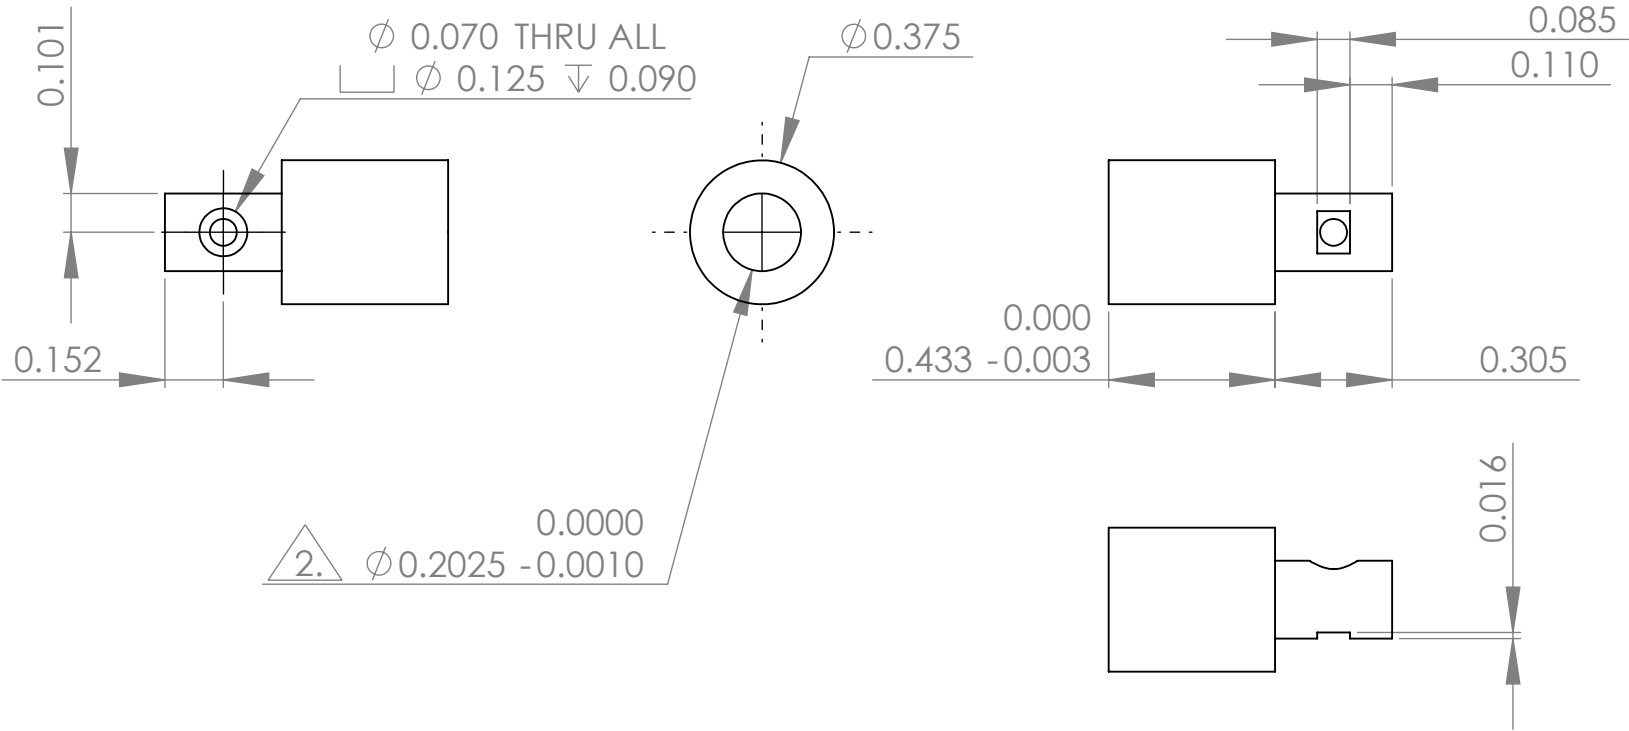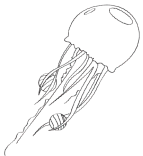

UNLESS OTHERWISE SPECIFIED  
DIMENSIONS ARE IN INCHES  
TOLERANCES:  
FRACTIONAL  $\pm 1/32$   
ANGULAR: MACH  $\pm 0.5$  DEG  
TWO PLACE DECIMAL  $\pm 0.01$   
THREE PLACE DECIMAL  $\pm 0.005$

TITLE:  
**ROTATOR SHAFT**

PROPRIETARY AND CONFIDENTIAL  
THE INFORMATION CONTAINED IN THIS DRAWING IS THE SOLE PROPERTY OF THE BEAMS LAB AT UCI'S BECKMAN LASER INSTITUTE. ANY REPRODUCTION IN PART OR AS A WHOLE WITHOUT THE WRITTEN PERMISSION OF THE BEAMS LAB IS PROHIBITED.

|            |                    |              |
|------------|--------------------|--------------|
| SIZE       | DWG. NO.           | REV          |
| <b>A</b>   | <b>107-001-003</b> | <b>B</b>     |
| SCALE: 3:1 | WEIGHT:            | SHEET 1 OF 1 |

GENERAL NOTES:

1. LUBRICATE THREADS WITH DOW CORNING 360 MEDICAL FLUID 1000 CST (POLYDIMETHYLSILOXANE)

| REV | MODEL BY     | DRAWN BY     | CHECKED BY   | DATE      |
|-----|--------------|--------------|--------------|-----------|
| A   | SAMIR SHREIM | SAMIR SHREIM | SAMIR SHREIM | 5/21/2009 |
| B   | SAMIR SHREIM | SAMIR SHREIM | SAMIR SHREIM | 3/24/2010 |
| C   | SAMIR SHREIM | SAMIR SHREIM |              |           |

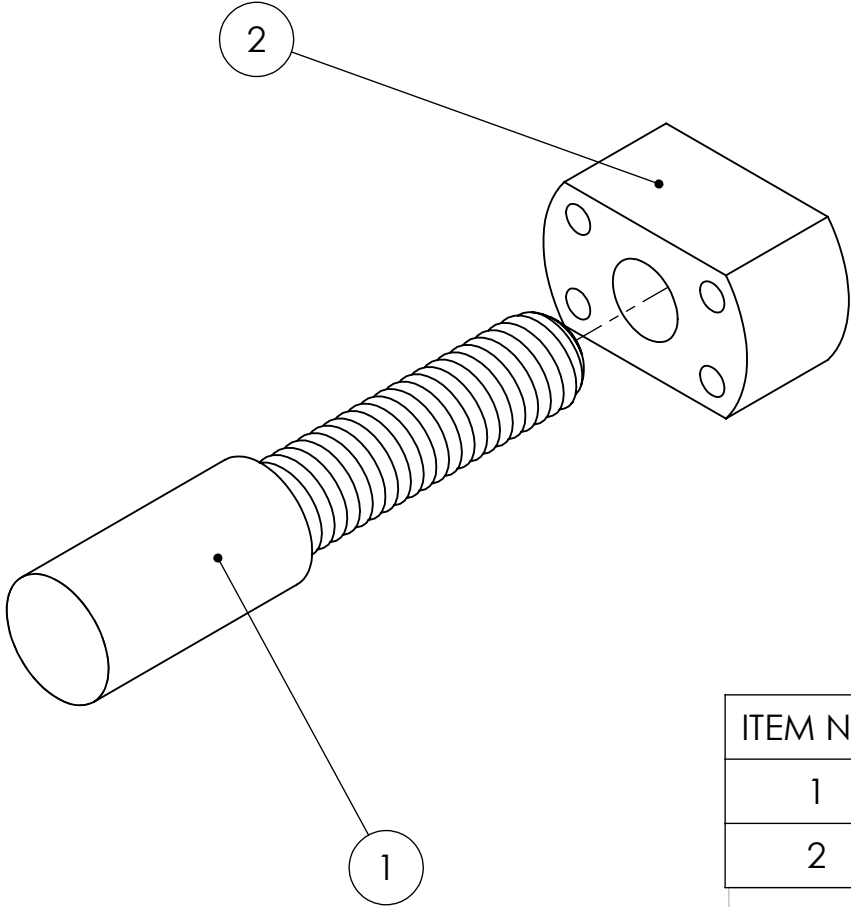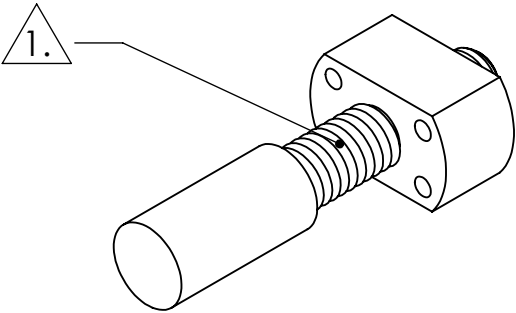

| ITEM NO. | PART NUMBER | DESCRIPTION     | QTY. |
|----------|-------------|-----------------|------|
| 1        | 107-002-001 | LEADSCREW       | 1    |
| 2        | 107-002-002 | LEADSCREW BLOCK | 1    |

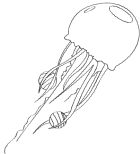

UNLESS OTHERWISE SPECIFIED  
DIMENSIONS ARE IN INCHES  
TOLERANCES:  
FRACTIONAL  $\pm 1/32$   
ANGULAR: MACH  $\pm 0.5$  DEG  
TWO PLACE DECIMAL  $\pm 0.01$   
THREE PLACE DECIMAL  $\pm 0.005$

|                                         |                                |                 |
|-----------------------------------------|--------------------------------|-----------------|
| TITLE:<br><b>LEADSCREW<br/>ASSEMBLY</b> |                                |                 |
| SIZE<br><b>A</b>                        | DWG. NO.<br><b>107-002-000</b> | REV<br><b>C</b> |
| SCALE: 3:1                              | WEIGHT:                        | SHEET 1 OF 1    |

PROPRIETARY AND CONFIDENTIAL  
THE INFORMATION CONTAINED IN THIS DRAWING IS THE SOLE PROPERTY OF THE BEAMS LAB AT UCI'S BECKMAN LASER INSTITUTE. ANY REPRODUCTION IN PART OR AS A WHOLE WITHOUT THE WRITTEN PERMISSION OF THE BEAMS LAB IS PROHIBITED.

GENERAL NOTES:

1. MATERIAL: MORTON MACHINE WORKS  
P/N 4360 (303 STAINLESS STEEL)

| REV | MODEL BY     | DRAWN BY     | CHECKED BY | DATE |
|-----|--------------|--------------|------------|------|
| A   | SAMIR SHREIM | SAMIR SHREIM |            |      |

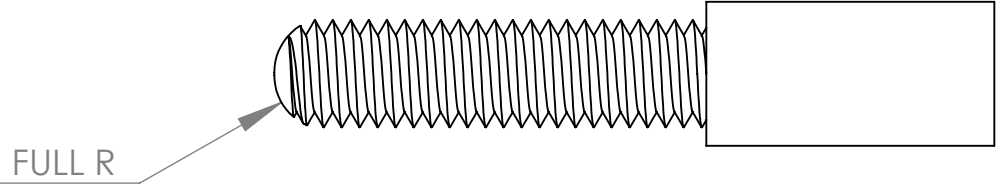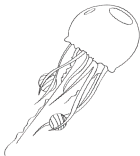

UNLESS OTHERWISE SPECIFIED  
DIMENSIONS ARE IN INCHES  
TOLERANCES:  
FRACTIONAL  $\pm 1/32$   
ANGULAR: MACH  $\pm 0.5$  DEG  
TWO PLACE DECIMAL  $\pm 0.01$   
THREE PLACE DECIMAL  $\pm 0.005$

|                            |                                |                 |
|----------------------------|--------------------------------|-----------------|
| TITLE:<br><b>LEADSCREW</b> |                                |                 |
| SIZE<br><b>A</b>           | DWG. NO.<br><b>107-002-001</b> | REV<br><b>A</b> |
| SCALE: 3:1                 | WEIGHT:                        | SHEET 1 OF 1    |

PROPRIETARY AND CONFIDENTIAL  
THE INFORMATION CONTAINED IN THIS DRAWING IS THE SOLE PROPERTY OF THE  
BEAMS LAB AT UCI'S BECKMAN LASER INSTITUTE. ANY REPRODUCTION IN PART OR AS  
A WHOLE WITHOUT THE WRITTEN PERMISSION OF THE BEAMS LAB IS PROHIBITED.



GENERAL NOTES:  
1. MATERIAL: 6061 ALUMINIUM

| REV | MODEL BY     | DRAWN BY     | CHECKED BY   | DATE      |
|-----|--------------|--------------|--------------|-----------|
| A   | SAMIR SHREIM | SAMIR SHREIM | SAMIR SHREIM | 5/21/2009 |
| B   | SAMIR SHREIM | SAMIR SHREIM | SAMIR SHREIM | 3/24/2010 |
| C   | SAMIR SHREIM | SAMIR SHREIM |              |           |

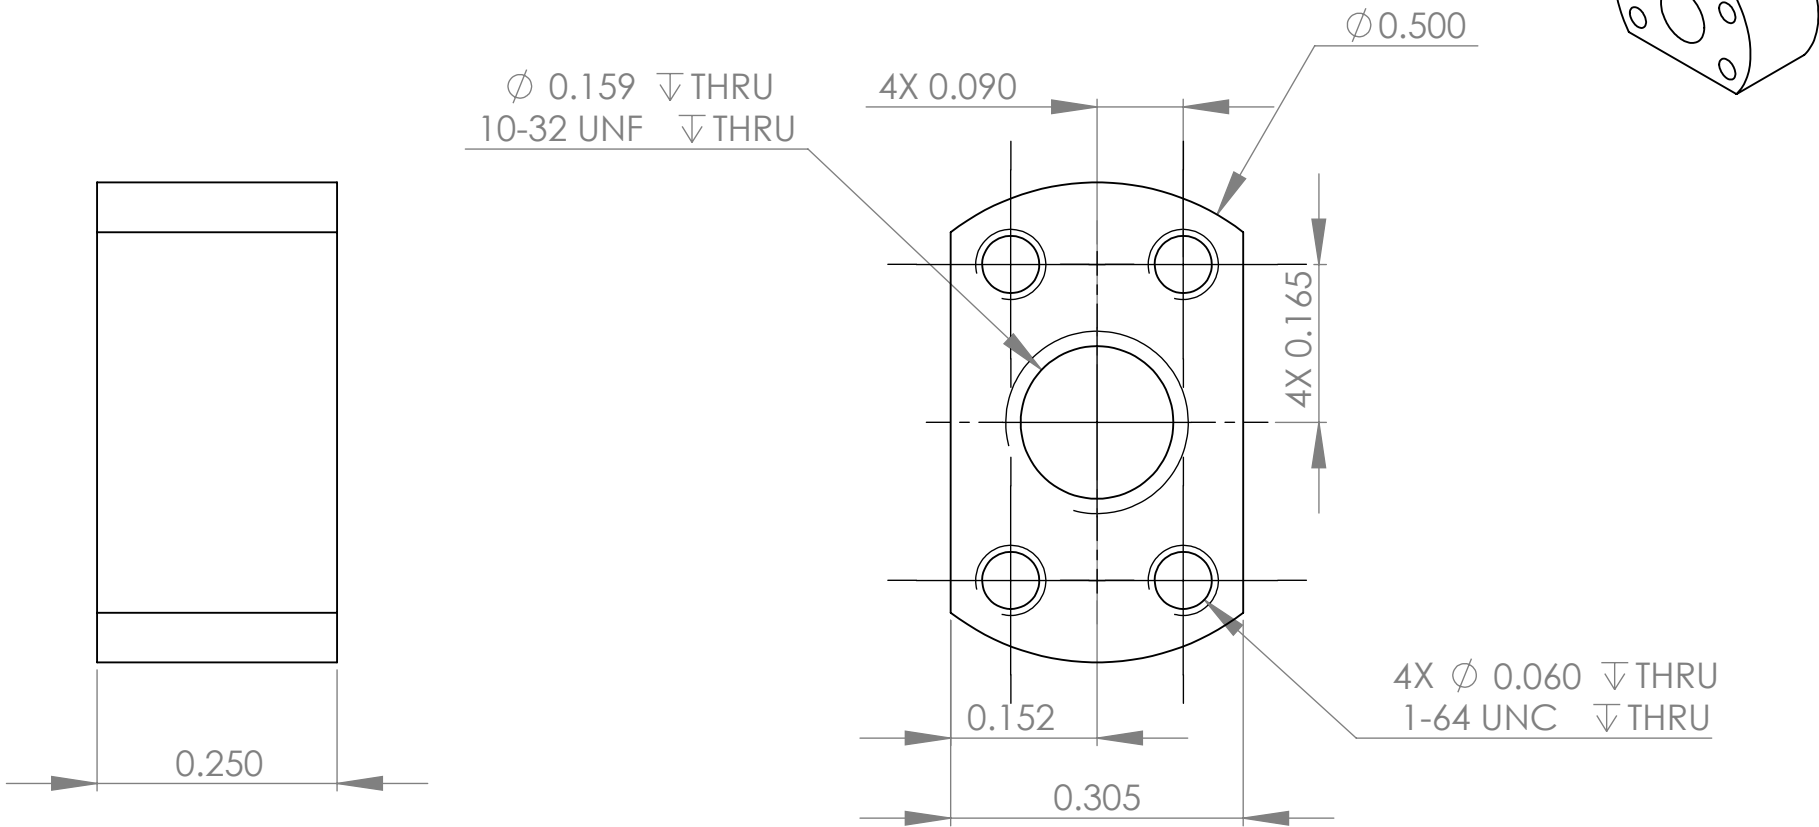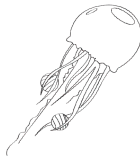

UNLESS OTHERWISE SPECIFIED  
DIMENSIONS ARE IN INCHES  
TOLERANCES:  
FRACTIONAL  $\pm 1/32$   
ANGULAR: MACH  $\pm 0.5$  DEG  
TWO PLACE DECIMAL  $\pm 0.01$   
THREE PLACE DECIMAL  $\pm 0.005$

TITLE:  
**LEADSCREW BLOCK**

PROPRIETARY AND CONFIDENTIAL  
THE INFORMATION CONTAINED IN THIS DRAWING IS THE SOLE PROPERTY OF THE  
BEAMS LAB AT UCI'S BECKMAN LASER INSTITUTE. ANY REPRODUCTION IN PART OR AS  
A WHOLE WITHOUT THE WRITTEN PERMISSION OF THE BEAMS LAB IS PROHIBITED.

| SIZE       | DWG. NO.    | REV          |
|------------|-------------|--------------|
| A          | 107-002-002 | C            |
| SCALE: 5:1 | WEIGHT:     | SHEET 1 OF 1 |

GENERAL NOTES:

1. BUSHING FIT AT 37°C 100% HUMIDITY

| REV | MODEL BY     | DRAWN BY     | CHECKED BY   | DATE      |
|-----|--------------|--------------|--------------|-----------|
| A   | SAMIR SHREIM | SAMIR SHREIM | SAMIR SHREIM | 5/21/2009 |
| B   | SAMIR SHREIM | SAMIR SHREIM |              |           |

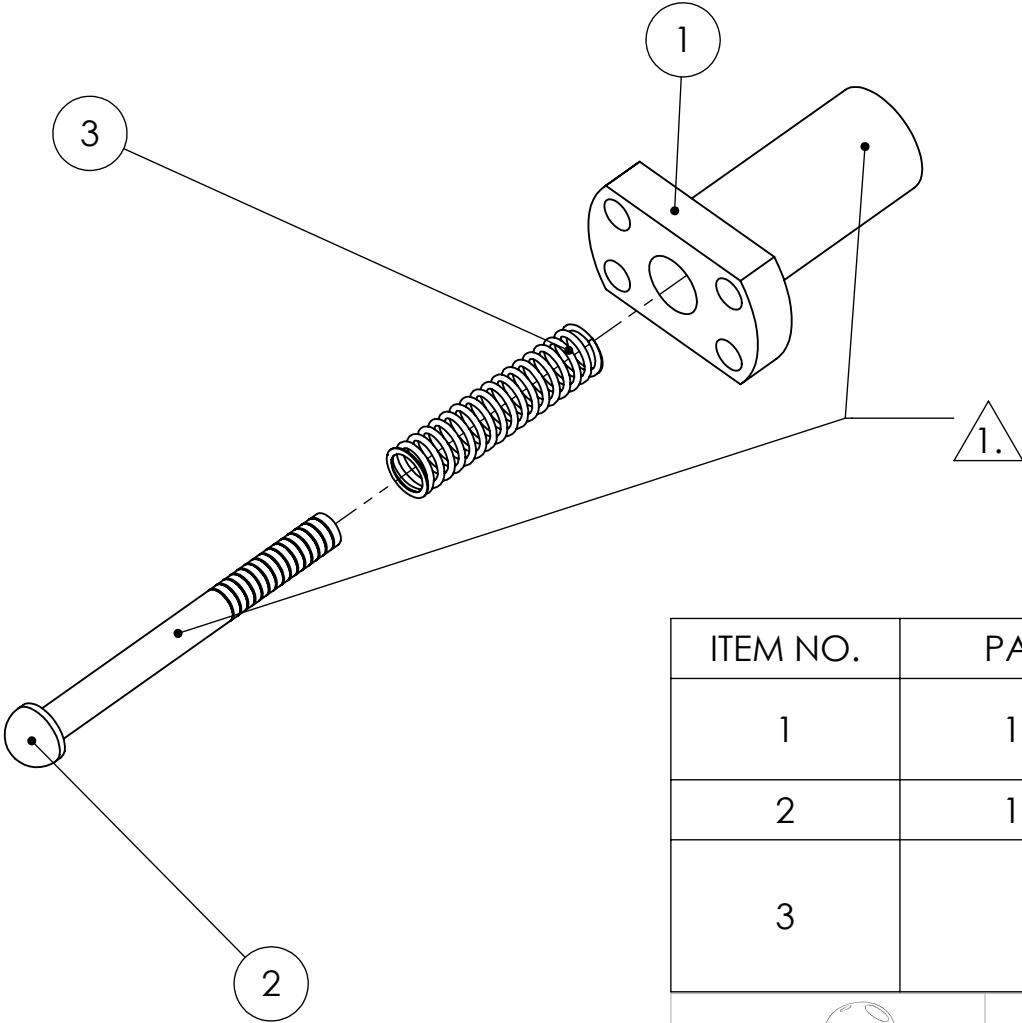

| ITEM NO. | PART NUMBER | DESCRIPTION                             | QTY. |
|----------|-------------|-----------------------------------------|------|
| 1        | 107-003-001 | SPRING PLUNGER BLOCK                    | 1    |
| 2        | 107-003-002 | SPRING PLUNGER                          | 1    |
| 3        | -           | SPRING, CENTURY SPRING CORP. P/N 70100S | 1    |

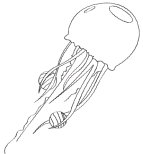

UNLESS OTHERWISE SPECIFIED  
DIMENSIONS ARE IN INCHES  
TOLERANCES:  
FRACTIONAL  $\pm 1/32$   
ANGULAR: MACH  $\pm 0.5$  DEG  
TWO PLACE DECIMAL  $\pm 0.01$   
THREE PLACE DECIMAL  $\pm 0.005$

TITLE:  
**SPRING PLUNGER  
ASSEMBLY**

PROPRIETARY AND CONFIDENTIAL  
THE INFORMATION CONTAINED IN THIS DRAWING IS THE SOLE PROPERTY OF THE BEAMS LAB AT UCI'S BECKMAN LASER INSTITUTE. ANY REPRODUCTION IN PART OR AS A WHOLE WITHOUT THE WRITTEN PERMISSION OF THE BEAMS LAB IS PROHIBITED.

SIZE **A** DWG. NO. **107-003-000** REV **B**

SCALE: 2.5:1 WEIGHT: SHEET 1 OF 1

GENERAL NOTES:

1. MATERIAL: ACETAL COPOLYMER BLACK

| REV | MODEL BY     | DRAWN BY     | CHECKED BY   | DATE      |
|-----|--------------|--------------|--------------|-----------|
| A   | SAMIR SHREIM | SAMIR SHREIM | SAMIR SHREIM | 5/21/2009 |
| B   | SAMIR SHREIM | SAMIR SHREIM |              |           |

2. BUSHING FIT WITH SPRING PLUNGER AT 37°C 100% HUMIDITY

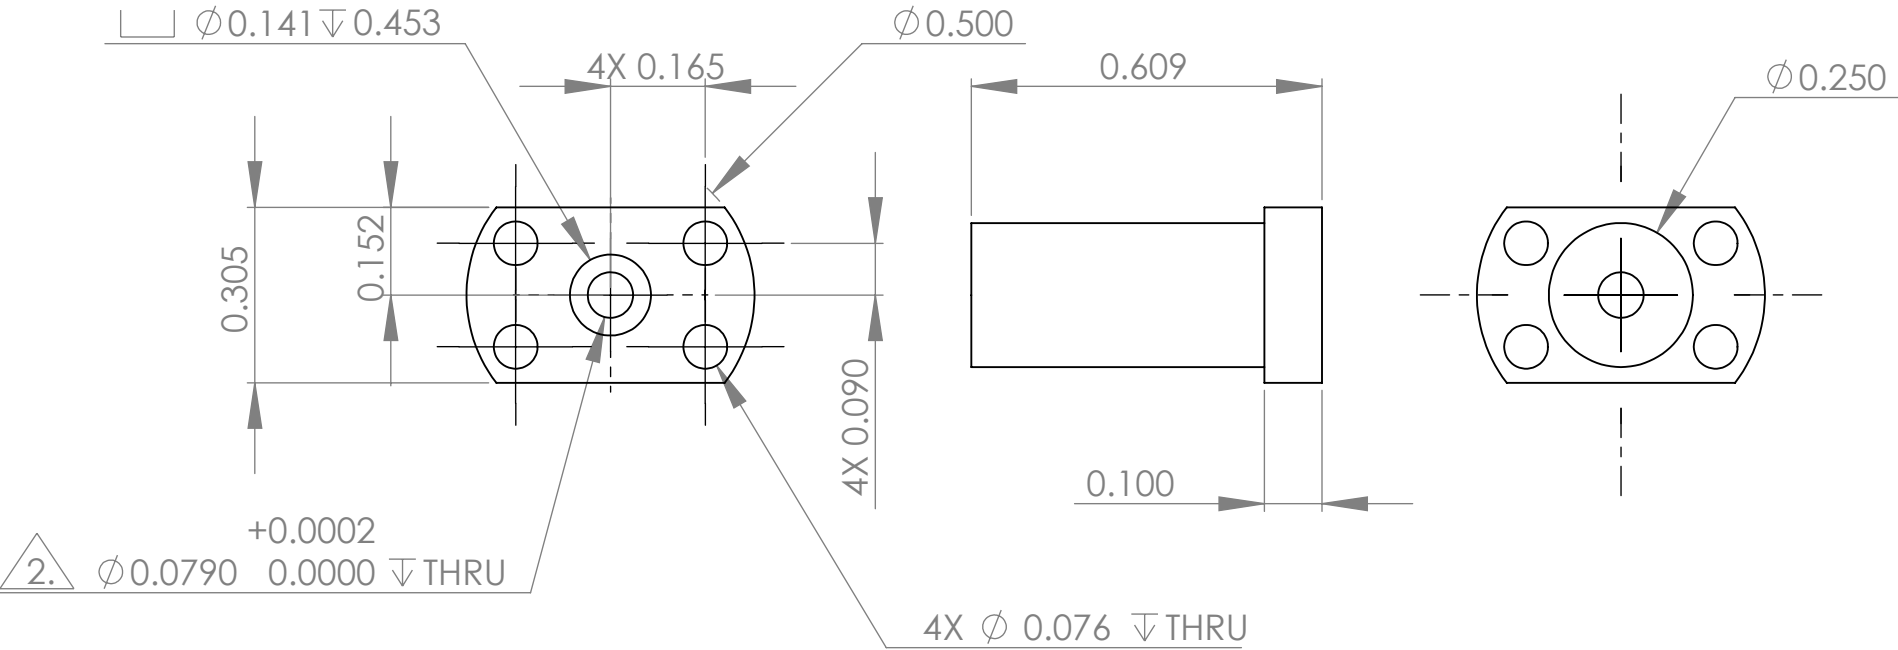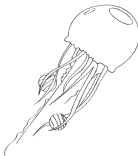

UNLESS OTHERWISE SPECIFIED  
DIMENSIONS ARE IN INCHES  
TOLERANCES:  
FRACTIONAL  $\pm 1/32$   
ANGULAR: MACH  $\pm 0.5$  DEG  
TWO PLACE DECIMAL  $\pm 0.01$   
THREE PLACE DECIMAL  $\pm 0.005$

TITLE:  
**SPRING PLUNGER  
BLOCK**

PROPRIETARY AND CONFIDENTIAL  
THE INFORMATION CONTAINED IN THIS DRAWING IS THE SOLE PROPERTY OF THE  
BEAMS LAB AT UCI'S BECKMAN LASER INSTITUTE. ANY REPRODUCTION IN PART OR AS  
A WHOLE WITHOUT THE WRITTEN PERMISSION OF THE BEAMS LAB IS PROHIBITED.

| SIZE       | DWG. NO.           | REV          |
|------------|--------------------|--------------|
| <b>A</b>   | <b>107-003-001</b> | <b>B</b>     |
| SCALE: 3:1 | WEIGHT:            | SHEET 1 OF 1 |

1. MATERIAL: 303 STAINLESS STEEL

|     |              |              |              |           |
|-----|--------------|--------------|--------------|-----------|
| REV | MODEL BY     | DRAWN BY     | CHECKED BY   | DATE      |
| A   | SAMIR SHREIM | SAMIR SHREIM | SAMIR SHREIM | 5/21/2009 |
| B   | SAMIR SHREIM | SAMIR SHREIM | SAMIR SHREIM |           |

## 2. BUSHING FIT WITH SPRIN PLUNGER BLOCK AT 37°C 100% HUMIDITY

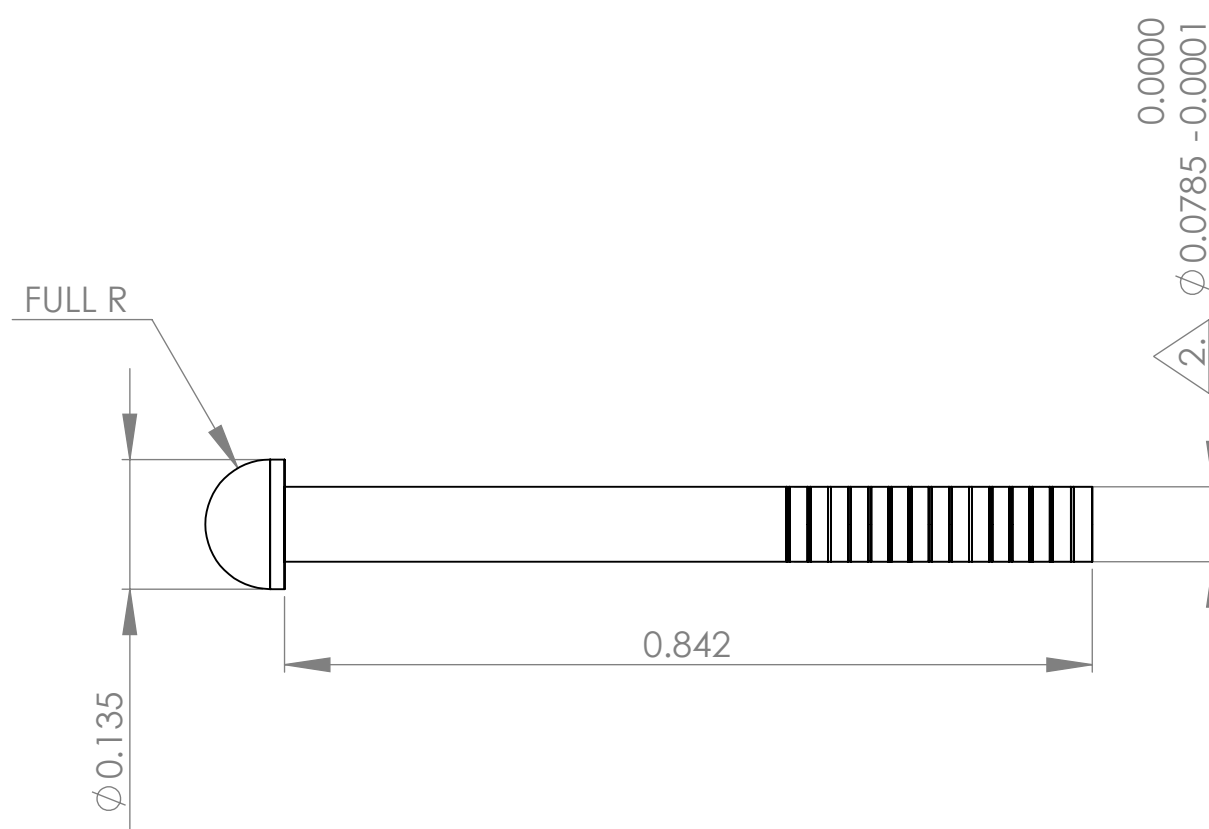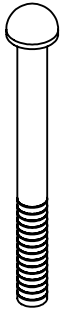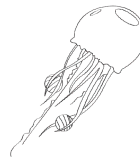

DIMENSIONS ARE IN INCHES  
TOLERANCES:  
FRACTIONAL  $\pm 1/32$   
ANGULAR: MACH  $\pm 0.5$  DEG  
TWO PLACE DECIMAL  $\pm 0.01$   
THREE PLACE DECIMAL  $\pm 0.005$

## SPRING PLUNGER

PROPRIETARY AND CONFIDENTIAL

THE INFORMATION CONTAINED IN THIS DRAWING IS THE SOLE PROPERTY OF THE BEAMS LAB AT UCI'S BECKMAN LASER INSTITUTE. ANY REPRODUCTION IN PART OR AS A WHOLE WITHOUT THE WRITTEN PERMISSION OF THE BEAMS LAB IS PROHIBITED.

|                  |                                |                 |
|------------------|--------------------------------|-----------------|
| SIZE<br><b>A</b> | DWG. NO.<br><b>107-003-002</b> | REV<br><b>B</b> |
|------------------|--------------------------------|-----------------|

|            |         |              |
|------------|---------|--------------|
| SCALE: 5:1 | WEIGHT: | SHEET 1 OF 3 |
|------------|---------|--------------|

GENERAL NOTES:

- 1. CENTER MARK
- 2. LASER MARKED PER DIAGRAM ON SHEET 3 (VENDOR: LASERMATION INC.)
- 3. LASER MARK PRIOR TO TURNING RADIUS

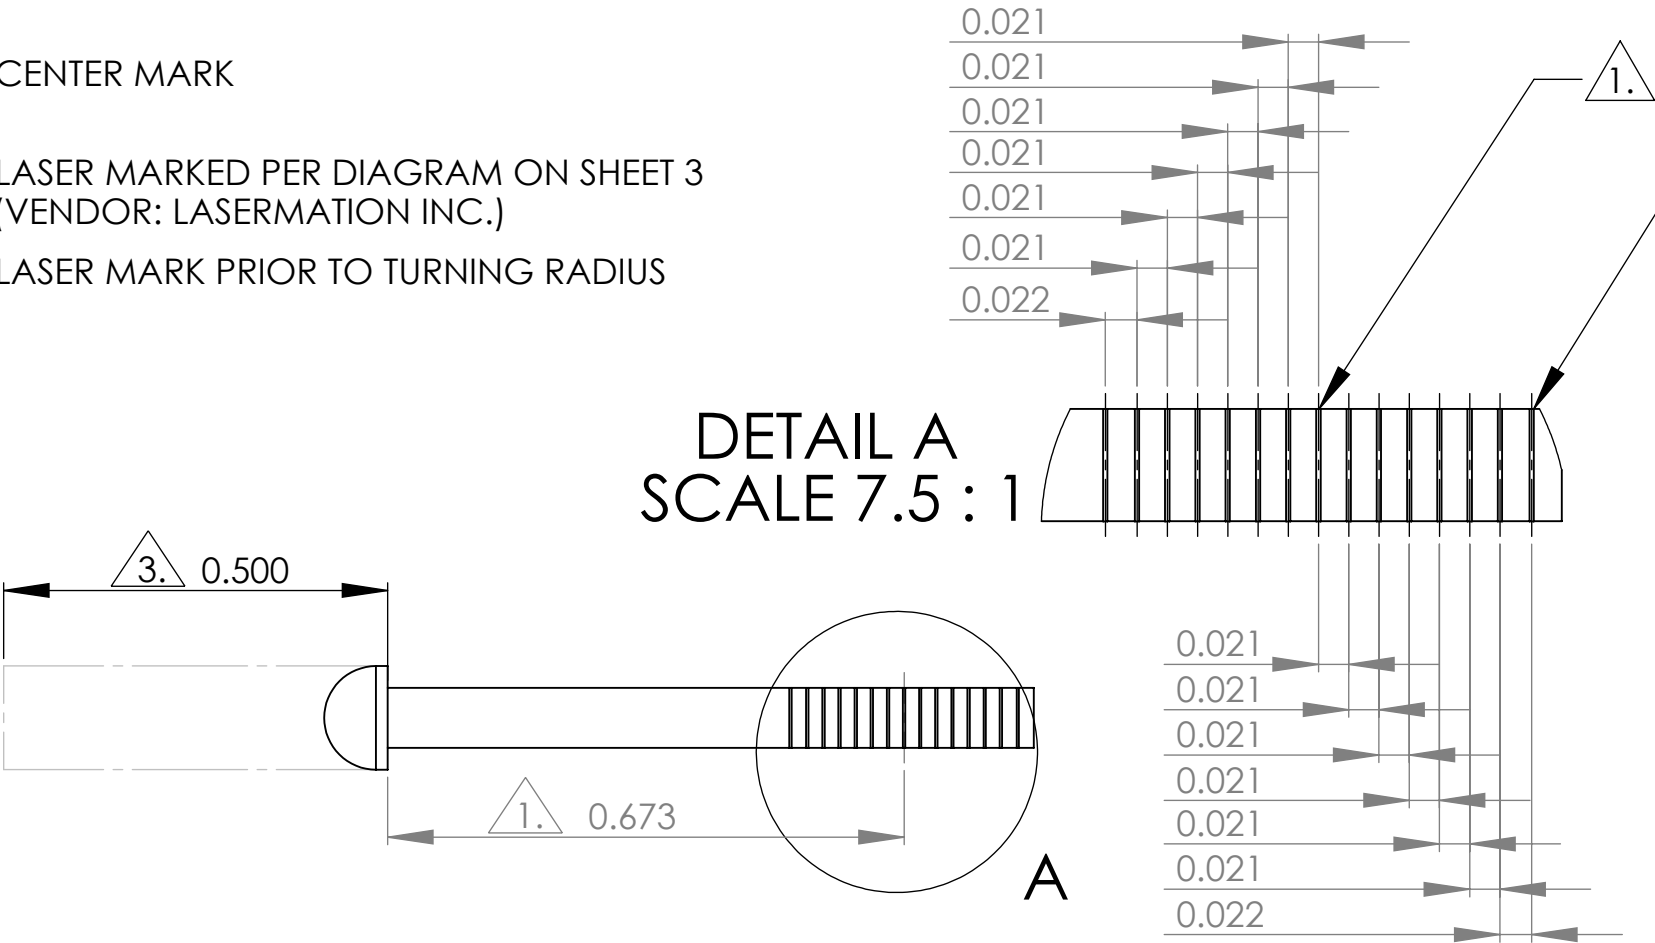

|                                                                                                                                                                                                                                                         |                                                                                                                                                                    |             |                |  |
|---------------------------------------------------------------------------------------------------------------------------------------------------------------------------------------------------------------------------------------------------------|--------------------------------------------------------------------------------------------------------------------------------------------------------------------|-------------|----------------|--|
|                                                                                                                                                                                                                                                         | UNLESS OTHERWISE SPECIFIED                                                                                                                                         |             | TITLE:         |  |
|                                                                                                                                                                                                                                                         | DIMENSIONS ARE IN INCHES<br>TOLERANCES:<br>FRACTIONAL $\pm 1/32$<br>ANGULAR: MACH $\pm 0.5$ DEG<br>TWO PLACE DECIMAL $\pm 0.01$<br>THREE PLACE DECIMAL $\pm 0.005$ |             | SPRING PLUNGER |  |
| PROPRIETARY AND CONFIDENTIAL<br>THE INFORMATION CONTAINED IN THIS DRAWING IS THE SOLE PROPERTY OF THE BEAMS LAB AT UCI'S BECKMAN LASER INSTITUTE. ANY REPRODUCTION IN PART OR AS A WHOLE WITHOUT THE WRITTEN PERMISSION OF THE BEAMS LAB IS PROHIBITED. | SIZE                                                                                                                                                               | DWG. NO.    | REV            |  |
|                                                                                                                                                                                                                                                         | A                                                                                                                                                                  | 107-003-002 | B              |  |
| SCALE: 4:1                                                                                                                                                                                                                                              |                                                                                                                                                                    | WEIGHT:     | SHEET 2 OF 3   |  |

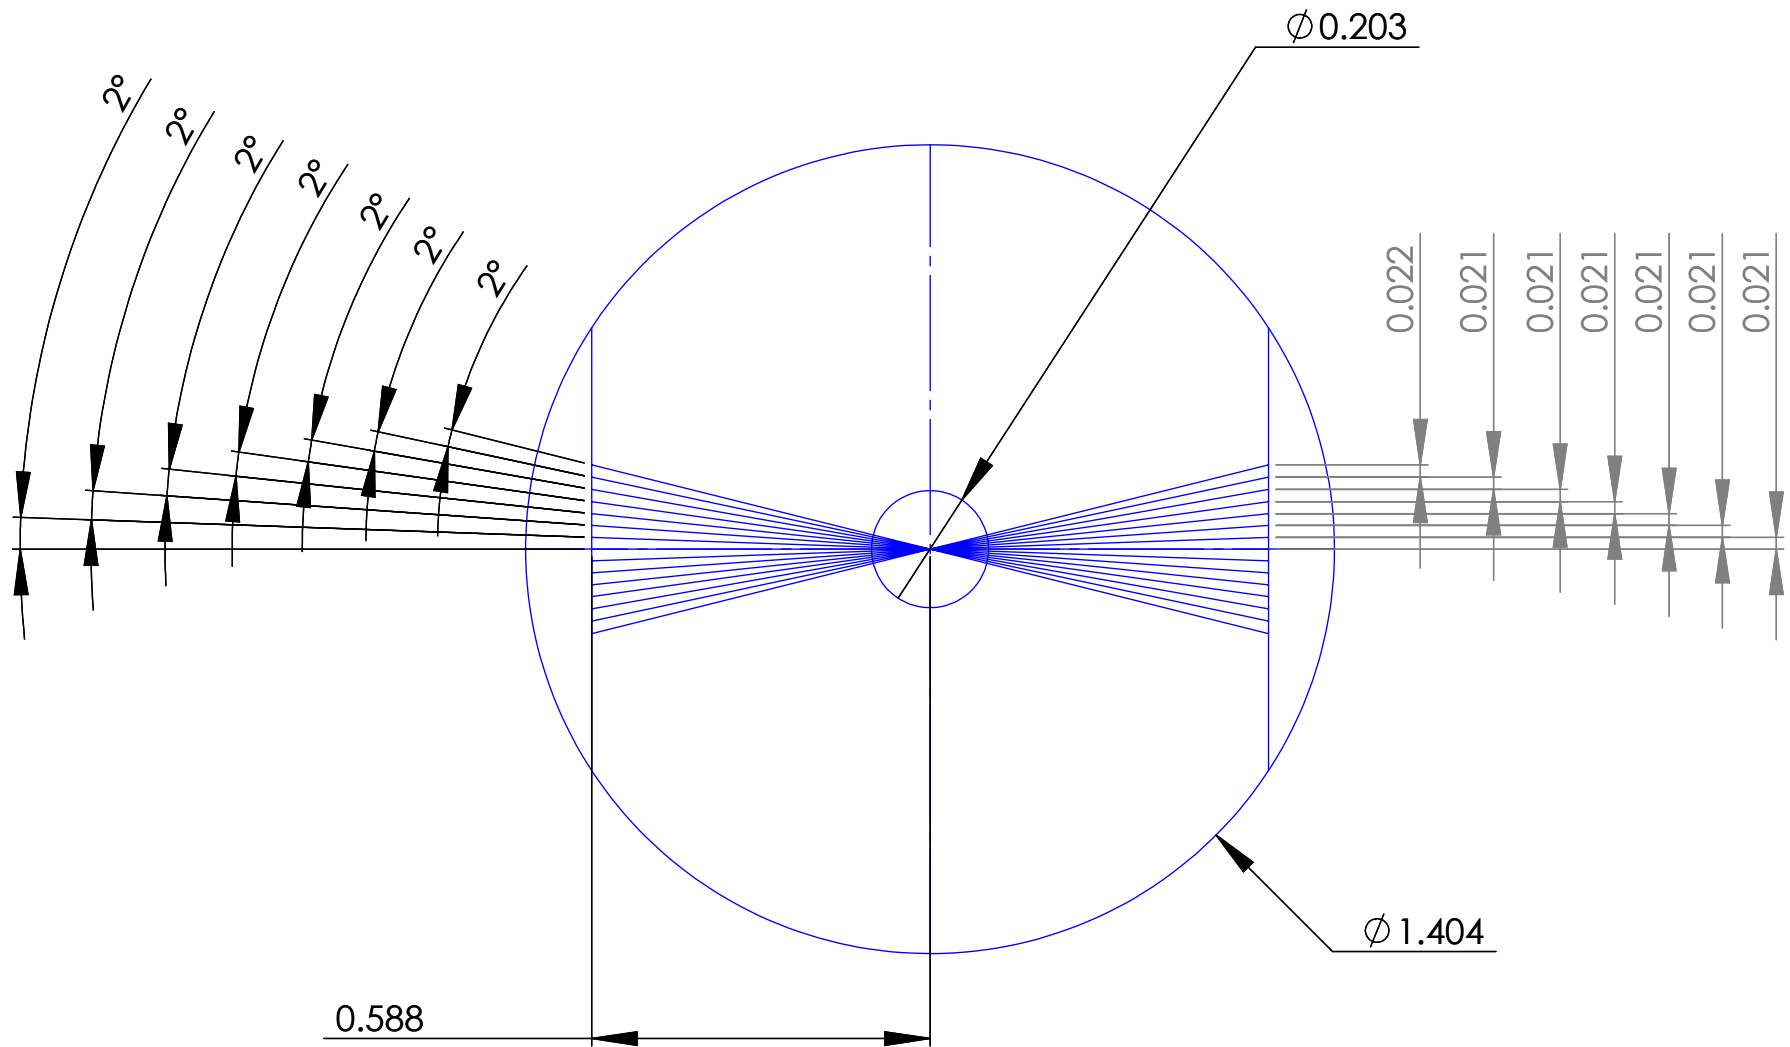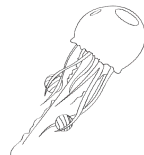

UNLESS OTHERWISE SPECIFIED

DIMENSIONS ARE IN INCHES  
TOLERANCES:  
FRACTIONAL  $\pm 1/32$   
ANGULAR: MACH  $\pm 0.5$  DEG  
TWO PLACE DECIMAL  $\pm 0.01$   
THREE PLACE DECIMAL  $\pm 0.005$

TITLE:

SPRING PLUNGER

PROPRIETARY AND CONFIDENTIAL  
THE INFORMATION CONTAINED IN THIS DRAWING IS THE SOLE PROPERTY OF THE BEAMS LAB AT UCI'S BECKMAN LASER INSTITUTE. ANY REPRODUCTION IN PART OR AS A WHOLE WITHOUT THE WRITTEN PERMISSION OF THE BEAMS LAB IS PROHIBITED.

| SIZE       | DWG. NO.    | REV          |
|------------|-------------|--------------|
| A          | 107-003-002 | B            |
| SCALE: 3:1 | WEIGHT:     | SHEET 3 OF 3 |
